# Supplementary material for: Synthesis and characterisation of water-soluble poly(aryl ether) dendrimers for encapsulation of biomimetic active site analogues †
Source: Royal Society of Chemistry journal article supplement (doi:10.1039/b002026p), 2000-01-01
Supplement: b002026p.doc [file b002026p.doc]

**Supplementary data**

# **Synthesis and characterisation of water soluble poly(aryl ether) dendrimers for encapsulation of biomimetic active site analogues**

# **Michael J. Hannon,* Paul C. Mayers and Paul C. Taylor***

Department of Chemistry, University of Warwick, Gibbet Hill Road, Coventry, UK CV4 7AL. Fax: + 44 (0)24 7652 4112; E-mail: M.J.Hannon@warwick.ac.uk; P.C.Taylor@warwick.ac.uk

**Further synthetic details**

Acid chloride **1**,11 tripyridylmethanol9 and MEM-protected ester **4**15 were prepared as reported in the literature.

# **Tris(2-pyridyl)methyl 3,5-bis(benzyloxy)benzoate 2**

Sodium hydride (24.5 mg, 1.02 mmol) was added to a stirred solution of tris(2-pyridyl)methanol (0.244 g, 0.927 mmol) in tetrahydrofuran under nitrogen. After effervescence had ceased, the solution was stirred for a further 15 minutes before the addition of acid chloride **1** (0.490 g, 1.390 mmol). After stirring for 18 hours, the solution was diluted with dichloromethane (30 cm3). The dichloromethane solution was washed successively with 0.2M sulphuric acid (10 cm3), 1M sodium hydroxide (10 cm3) and water (10 cm3) before drying over sodium sulfate, filtering and removal of the solvent under reduced pressure to give a yellow oil. Purification by flash chromatography on silica (2 cm x 20 cm) using 1% methanol in dichloromethane as eluant gave ester **2** (0.430 g, 80%) as a white solid (Found: C, 76.2; H, 5.1; N 7.0. C37H29N3O4 requires C, 76.6; H, 5.0; N, 7.2%); H(250 MHz; CDCl3); 5.06 (4H, s, CH2), 6.82 (1H, t, *J* 2.1, 4-Ar), 7.16 (3H, ddd, *J* 7.3, 4.7, 1.4, 5-Py), 7.30-7.45 (10H, m, benzyl), 7.46 (2H, d, *J* 2.1, 2-Ar), 7.69 (3H, ddd, *J* 8.1, 7.3, 1.8, 4-Py), 7.86 (3H, ddd, *J* 8.1, 1.4, 0.9, 3-Py), 8.55 (3H, ddd, *J* 4.7, 1.8, 0.9, 6-Py); C(62.9 MHz; CDCl3) 70.5 (CH2), 89.9 (*C*Py3), 107.7 (4-Ph), 109.4 (2-Ph), 122.7 (5-Py), 123.7 (3-Py), 128.0, 128.6 and 129.1 (2,3,4-Bn), 133.2 (1-Ph), 136.6 (4-Py), 137.0 (1-Bn), 149.1 (6-Py), 160.2 and 160.6 (2-Py and 3-Ph), 165.1 (C=O); *m/z* (FAB+) 580 (100%, MH+).

**3,5-Bis(methoxyethoxymethoxy)benzoic acid 5**

Methyl ester **4** (1.00 g, 2.90 mmol), ethanol (3 cm3) and 40% aqueous potassium hydroxide (5 cm3) were heated at reflux for 3 hours. After cooling, the solution was neutralised with 18% hydrochloric acid and extracted with dichloromethane (3 x 20 cm3). The combined extracts were dried over sodium sulfate, filtered and the solvent removed under reduced pressure to give acid **7** (0.73 g, 76%) as a colourless oil which slowly became a white solid. (Found: C, 54.1; H, 6.6. C15H22O8 requires C, 54.5; H, 6.7%); H(250 MHz; CDCl3) 3.37 (6H, s, OMe), 3.55 and 3.82 (2 x 4H, 2m, -CH2CH2-), 5.28 (4H, s, -OCH2O-), 6.97 (1H, t, *J* 2.3, 4-ArH), 7.42 (2H, d, *J* 2.3, 2-ArH), 8.40 (1H, br, CO2H); C(75.5 MHz; CDCl3) 59.4 (OMe), 68.2 and 71.9 (CH2CH2), 93.9 (OCH2O), 110.7 (4-Ar), 111.7 (2-Ar), 131.9 (1-Ar), 158.5 (3-Ar), 171.3 (C=O); *m/z* (FAB+) 330.0 (100%, M+).

**3,5-Bis(methoxyethoxymethoxy)benzyl alcohol 6**

To a stirred, ice-cooled suspension of lithium aluminium hydride (1.102 g, 29.0 mmol) in dry diethyl ether (15 cm3) was added a solution of ester **4** (5.0 g, 14.5 mmol) in dry diethyl ether (50 cm3) dropwise over 30 minutes. The resulting mixture was stirred at room temperature for 4 hours before the reaction was quenched by the sequential addition of water (1.1 cm3), 15% aqueous sodium hydroxide (1.1 cm3) and water (3.3 cm3). The precipitate formed was removed by filtration and washed well with tetrahydrofuran. The combined filtrate and tetrahydrofuran washings were dried over sodium sulfate, filtered and the solvent removed under reduced pressure to give alcohol **8** (4.59 g, 100%) as a colourless oil. H(250 MHz; CDCl3) 2.00 (1H, br, OH), 3.35 (6H, s, OMe), 3.53 and 3.79 (2 x 4H, 2m, -CH2CH2-), 4.59 (2H, s, C*H*2OH), 5.22 (4H, s, -OCH2O-), 6.63 (1H, t, *J* 2.3, 4-ArH), 6.71 (2H, d, *J* 2.3, 2-ArH); C(75.5 MHz; CDCl3) 59.3 (OMe), 65.1 (*C*H2OH), 68.0 and 71.9 (2 x CH2), 93.8 (O*C*H2O), 104.2 (C4), 108.3 (C2), 144.2 (C1), 158.7 (C3); *m/z* (CI+) 334 (100%, [M+NH4]+), 316 (95, M+), 299 (35), 258 (95), 242 (85), 228 (45), 211 (34).

**1-Bromomethyl-3,5-bis(methoxyethoxymethoxy)benzene 7**

A solution of triphenylphosphine (1.728 g, 6.59 mmol) in dry tetrahydrofuran (2 cm3) was added dropwise over 10 minutes to a stirred, ice-cooled solution of alcohol **6** (1.39 g, 4.39 mmol) and tetrabromomethane (2.19 g, 6.59 mmol) in dry tetrahydrofuran (5 cm3) under nitrogen. The ice bath was removed and the mixture warmed to room temperature over 15 minutes. Water (15 cm3) was added and the mixture extracted with dichloromethane (3 x 50 cm3). The combined extracts were dried over sodium sulfate, filtered and the solvent removed under reduced pressure to give a brown oil which was purified by flash chromatography on silica (4 cm x 20 cm) using dichloromethane containing 1-2.5% methanol as eluant to give bromide **9** (0.85 g, 49%) as a colourless oil H(250 MHz; CDCl3) 3.37 (6H, s, OMe), 3.55 and 3.80 (2 x 4H, 2m, -CH2CH2-), 4.38 (2H, s, CH2Br), 5.23 (4H, s, -OCH2O-), 6.66 (1H, t, *J* 2.3, 4-ArH), 6.75 (2H, d, *J* 2.3, 2-ArH); C(62.9 MHz; CDCl3) 33.1 (CH2Br), 58.8 (OMe), 67.5 and 71.3 (2 x CH2), 93.2 (OCH2O), 104.8 (4-Ar), 110.2 (2-Ar), 139.6 (1-Ar), 158.1 (3-Ar); *m/z* (EI+) 378/380 (40%, MH+), 303/305 (65), 89 (100).

**1-(Tri(2-pyridyl)methoxymethyl)-3,5-bis(methoxyethoxymethoxy)benzene 8**

Tri(2-pyridyl)methanol (0.300 g, 1.14 mmol) and sodium hydride (60% dispersion in oil, 0.055 g, 1.37 mmol) were placed in a flask under nitrogen. Anhydrous dimethylformamide (1.5 cm3) was added and the mixture stirred until effervescence ceased. Bromide **7** (0.541 g, 1.37 mmol) in anhydrous dimethylformamide (1 cm3) was added to the brown slurry and the mixture stirred for 18 hours before the product was partitioned between ethyl acetate (50 cm3) and water (10 cm3). The ethyl acetate layer was separated and washed with water (2 x 15 cm3), dried over sodium sulfate, filtered and the solvent removed under reduced pressure. The brown oil obtained was purified by flash chromatography on silica (2 cm x 20 cm) using 5% methanol in dichloromethane as eluant to give ether **8** (0.645 g, 85%) as a colourless oil H(250 MHz; CDCl3) 3.35 (6H, s, OMe), 3.53 and 3.79 (2 x 4H, 2m, -CH2CH2-), 4.43 (2H, s, C*H*2OCPy3), 5.21 (4H, s, -OCH2O-), 6.63 (1H, t, *J* 2.3, 4-ArH), 6.74 (2H, d, *J* 2.3, 2-ArH), 7.13 (3H, ddd, *J* 7.4, 4.8, 1.2, 5-PyH), 7.65 (3H, ddd, *J* 8.2, 7.4, 1.8, 4-pyH), 7.72 (3H, ddd, *J* 8.2, 1.2, 0.8, 3-PyH), 8.56 (3H, ddd, *J* 4.8, 1.8, 0.8, 6-PyH).

**1-(Tris(2-pyridyl)methoxymethyl)-3,5-dihydroxybenzene hydrochloride 9**

36% Hydrochloric acid (0.75 cm3) was added to a solution of MEM-protected **8** (0.380 g, 0.677 mmol) in methanol (7 cm3). The mixture was stirred for 3 hours before the solvent and excess hydrogen chloride was removed under reduced pressure to give deprotected product **11** (0.310 g, 100%) as a pale pink solid (Found: C, 60.3; H, 5.1; N, 9.1. C23H19N3O3·HCl·2H2O requires C, 60.3; H, 5.3; N, 9.2%); H(250 MHz; (CD3)2SO) 4.19 (2H, s, CH2), 6.19 (1H, t, *J* 2.2, 4-ArH), 6.24 (2H, d, *J* 2.2, 2-ArH), 7.65 (3H, ddd, *J* 7.5, 4.8, 1.3, 5-PyH), 7.85 (3H, d, *J* 8.0, 1.3, 0.9, 3-PyH), 8.19 (3H, ddd, *J* 8.0, 7.5, 1.8, 4-PyH), 8.70 (3H, ddd, *J* 4.8, 1.8, 0.9, 6-PyH); *m/z* (FAB+) 386 (100%, MH+).

## G2 dendrimer 10

Dihydroxy compound **9** (0.247 g, 0.539 mmol), acid **5** (0.534 g, 1.617 mmol), dicyclohexylcarbodiimide (0.444 g, 2.156 mmol) and dimethylaminopyridinium tosylate (DPTS) (63 mg, 0.216 mmol) in dry dichloromethane (7 cm3) were stirred at room temperature for 18 hours. The pale yellow suspension obtained was diluted with dichloromethane (50 cm3), washed with saturated aqueous sodium bicarbonate (10 cm3), dried over sodium sulfate, filtered and the solvent removed under reduced pressure. The pale oil obtained was purified by flash chromatography on silica (2 cm x 20 cm) using 3% methanol in dichloromethane as eluant to give dendrimer **10** (0.351 g, 64%) as a viscous, colourless oil H(250 MHz; CDCl3) 3.35 (12H, s, OMe), 3.54 and 3.81 (2 x 4H, 2m, -CH2CH2-), 4.58 (2H, s, C*H*2OCPy3), 5.28 (8H, s, -OCH2O-), 6.99 (3H, m, 4-ArH and 4’-ArH), 7.13 (5H, m, 5-PyH and 2-ArH), 7.49 (4H, d, *J* 2.3, 2’-ArH), 7.61 - 7.72 (6H, m, 3-PyH and 4-pyH), 8.56 (3H, ddd, *J* 4.7, 1.9, 0.8, 6-PyH).

## MEM-terminated G2-OH dendrimer 11

Bromide **7** (0.810 g, 2.04 mmol), 3,5-dihydroxybenzyl alcohol (0.144 g, 1.025 mmol), anhydrous potassium carbonate (0.354 g, 2.56 mmol) and 18-crown-6 (54 mg, 0.205 mmol) in dry acetone (10 cm3) were heated at reflux under nitrogen for 15 hours. After cooling, the solvent was removed under reduced pressure and the product partitioned between dichloromethane (20 cm3) and water (15 cm3). The water layer was further extracted with dichloromethane ( 3 x 15 cm3) and the combined organic layers dried over sodium sulfate, filtered and the solvent removed under reduced pressure. The pale oil obtained was purified by flash chromatography on silica (2 cm x 20 cm) using 1-5% methanol in dichloromethane as eluant to give dendrimer **11** (0.759 g, 100%) as a colourless oil (Found: C, 59.4; H, 7.0. C37H52O15·0.5H2O requires C, 59.6; H, 7.2%); H(250 MHz; CDCl3) 2.05 (1H, t, *J* 6.1, OH), 3.35 (12H, s, OMe), 3.53 and 3.79 (2 x 8H, 2m, CH2CH2), 4.60 (2H, d, *J* 6.1, C*H*2OH), 4.95 (4H, s, CH2), 5.23 (8H, s, OCH2O), 6.49 (1H, t, *4J* 2.2, 4-Ar), 6.59 (2H, d, *J* 2.2, 2-Ar), 6.68 (2H, t, *J* 2.4, 4-Ar’), 6.77 (4H, d, *J* 2.4, 2-Ar’); C(62.9 MHz; CDCl3) 58.5 (OMe), 64.4 (CH2OH), 67.2 and 71.2 (CH2CH2), 69.3 (G2 CH2), 93.1 (OCH2O), 100.8 (C4), 104.0 (C4’), 105.3 (C2), 108.4 (C2’), 139.5 (C1’), 143.6 (C1), 158.1 (C3’), 159.5 (C3); *m/z* (EI+) 736 (M+, 16%), 642 (90), 571 (85), 554 (100).

**MEM-terminated G2-Br dendrimer 12**

A solution of triphenylphosphine (0.506 g, 1.93 mmol) in dry tetrahydrofuran (1 cm3) was added dropwise over 10 minutes to a stirred, ice-cooled solution of dendrimer **11** (0.711 g, 0.965 mmol) and tetrabromomethane (0.640 g, 1.93 mmol) in dry tetrahydrofuran (2.5 cm3) under nitrogen. The mixture was stirred for 1 hour before removal of the ice bath, and allowed to warm to room temperature over 30 minutes. The product was partitioned between water (25 cm3) and dichloromethane (25 cm3). The water layer was separated and extracted with further dichloromethane (2 x 25 cm3). The combined organic layers were dried over sodium sulfate, filtered and the solvent removed under reduced pressure. The brown oil obtained was purified by flash chromatography on silica (2 cm x 25 cm) using a 3:1:4 dichloromethane / acetone / hexane mixture as eluant to give bromo dendrimer **14** (0.300 g, 39%) as a colourless oil. H(250 MHz; CDCl3) 3.35 (12H, s, OMe), 3.53 and 3.79 (2 x 8H, 2m, CH2CH2), 4.39 (2H, s, CH2Br), 4.93 (4H, s, CH2), 5.24 (8H, s, OCH2O), 6.50 (1H, t, *J* 2.2, 4-Ar), 6.60 (2H, d, *J* 2.2, 2-Ar), 6.69 (2H, t, *J* 2.4, 4-Ar’), 6.77 (4H, d, *J* 2.4, 2-Ar’)

**MEM-terminated G3 dendrimer 13**

Bromide **12** (0.268 g, 0.335 mmol), 3,5-dihydroxybenzyl alcohol (0.0234 g, 0.167 mmol), anhydrous potassium carbonate (0.058 g, 0.418 mmol) and 18-crown-6 (0.0088 g, 0.033 mmol) in dry acetone (3 cm3) were heated at reflux under nitrogen for 15 hours. After cooling, the solvent was removed under reduced pressure and the product partitioned between dichloromethane (10 cm3) and water (10 cm3). The water layer was further extracted with dichloromethane ( 3 x 10 cm3) and the combined organic layers dried over sodium sulfate, filtered and the solvent removed under reduced pressure. The pale oil obtained was purified by flash chromatography on silica (2 cm x 20 cm) using 5% methanol in dichloromethane as eluant to give dendrimer **12** (0.231 g, 88%) as a colourless oil H(250 MHz; CDCl3) 3.33 (24H, s, OMe), 3.52 and 3.78 (2 x 16H, 2m, CH2CH2), 4.48 (2H, s, C*H*2OH), 4.93 (12H, s, CH2’ and CH2’’), 5.21 (16H, s, OCH2O), 6.51 (3H, m, 4Ar and 4Ar’), 6.58 (2H, d, *J* 2.2, 2-Ar), 6.63 (4H, t, *J* 2.2, 2-Ar’), 6.68 (4H, t, *J* 2.2, 4-Ar’’), 6.76 (8H, d, *J* 2.2, 2-Ar’’); C(75.5 MHz; CDCl3) 59.4 (OMe), 65.3 (CH2OH), 68.1 and 71.9 (CH2CH2), 70.2 (CH2’ and CH2’’), 93.8 (OCH2O), 101.4 (C4), 101.9 (c4’), 104.7 (C4’’), 106.0 (C2), 106.7 (C2’), 109.1 (C2’’), 139.6 and 139.7 (C1’ and C1’’), 144.3 (C1), 158.8 (C3’’), 160.4 (C3 and C3’).
